# Supplementary material for: Autoantibodies to MOG in a distinct subgroup of adult multiple sclerosis
Source: PubMed Central journal article supplement — Neurol Neuroimmunol Neuroinflamm. 2016 Jun 30;3(5):e257. doi: 10.1212/NXI.0000000000000257 (PMC4949775; doi:10.1212/nxi.0000000000000257), 2016-06-30
Supplement: supp_3.5.e257_Figure_e-1.pdf [file supp_3.5.e257_Figure_e-1.pdf]

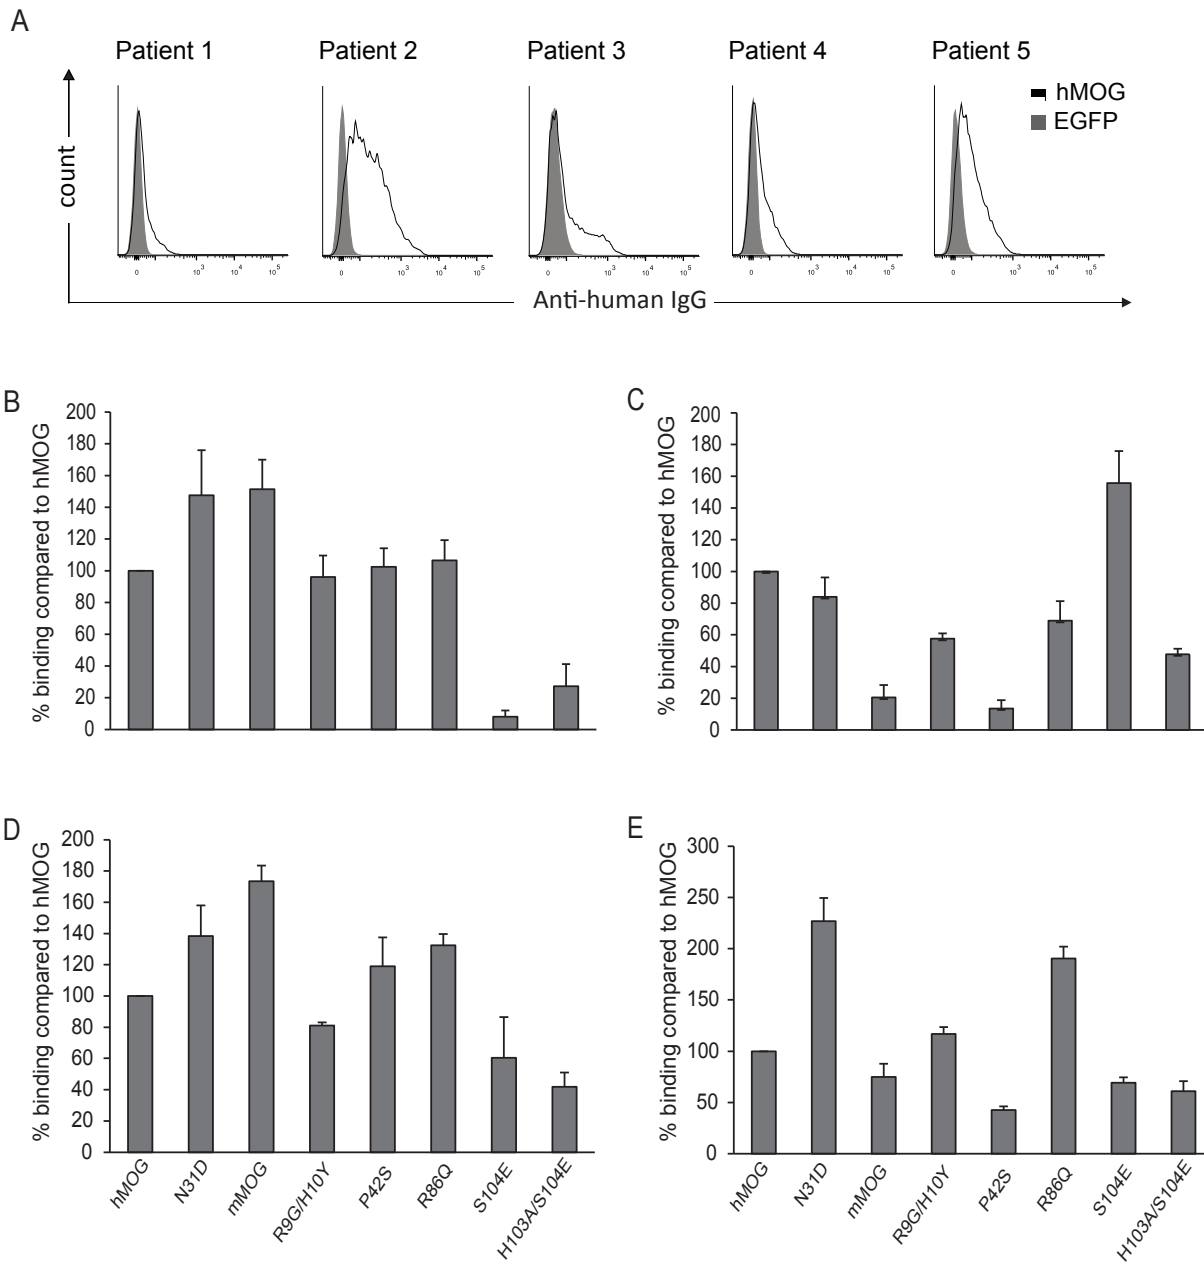

**Figure e-1: Binding of anti-MOG IgG to conformation-intact MOG and determination of epitope specificity**

A) HeLa cells transiently transfected with EGFP (closed grey graph) or hMOG-EGFP (black line) were used to detect anti-MOG reactivity in serum which was diluted 1:50. A representative histogram of three independent experiments is shown.

B-E): Reactivity to MOG -mutants of patients 1, 3, 4 and 5. A serum sample from the timepoint with the highest anti -MOG reactivity was used to analyze the epitope specificity with mutated variants of hMOG and with mMOG. Values obtained with wild -type hMOG were set as 100 % and the other reactivities were calculated. Shown are the mean values of three independent experiments  $\pm$  SEM.
