# Supplementary material for: Autoantibodies to MOG in a distinct subgroup of adult multiple sclerosis
Source: PubMed Central journal article supplement — Neurol Neuroimmunol Neuroinflamm. 2016 Jun 30;3(5):e257. doi: 10.1212/NXI.0000000000000257 (PMC4949775; doi:10.1212/nxi.0000000000000257), 2016-06-30
Supplement: supp_3.5.e257_Figure_e-2.pdf [file supp_3.5.e257_Figure_e-2.pdf]

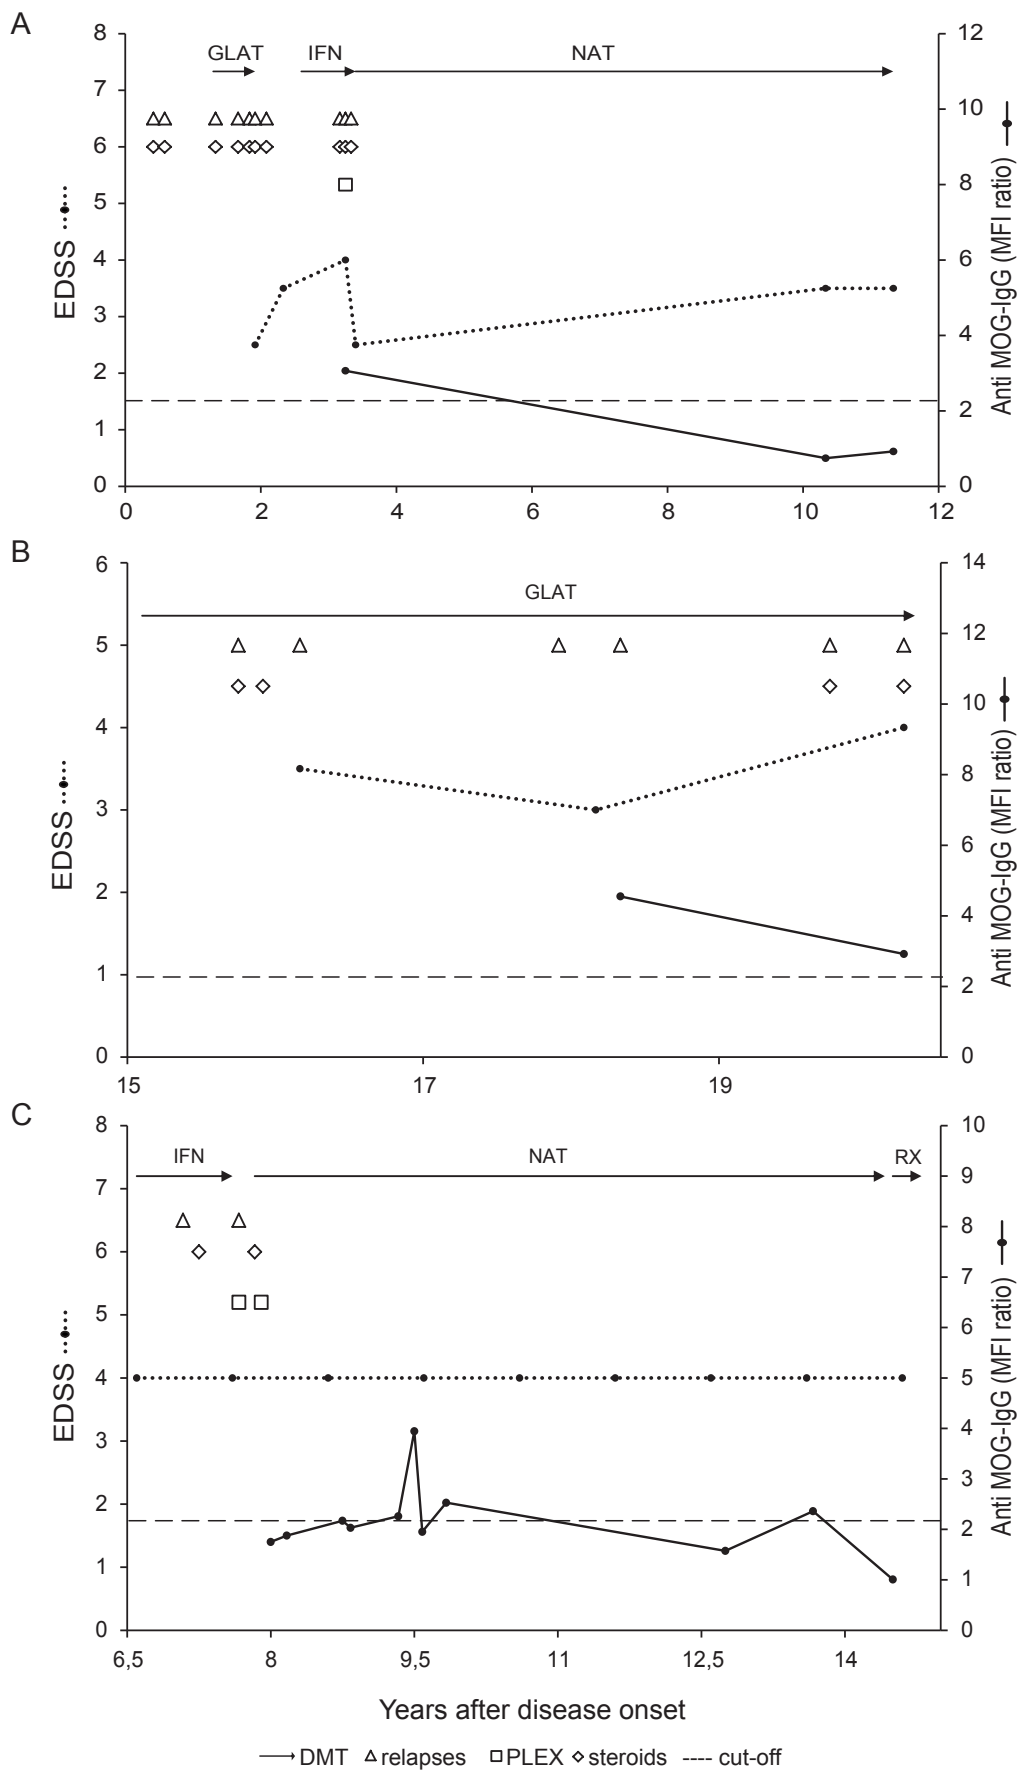

**Figure e- 2: Longitudinal analysis of anti-MOG-Abs and clinical course**

*A, B, C: Clinical features, therapies and longitudinal analysis of abs to MOG in patients 3-5.*
