# Supplementary material for: Autoantibodies to MOG in a distinct subgroup of adult multiple sclerosis
Source: PubMed Central journal article supplement — Neurol Neuroimmunol Neuroinflamm. 2016 Jun 30;3(5):e257. doi: 10.1212/NXI.0000000000000257 (PMC4949775; doi:10.1212/nxi.0000000000000257), 2016-06-30
Supplement: supp_3.5.e257_Figure_e-3.pdf [file supp_3.5.e257_Figure_e-3.pdf]

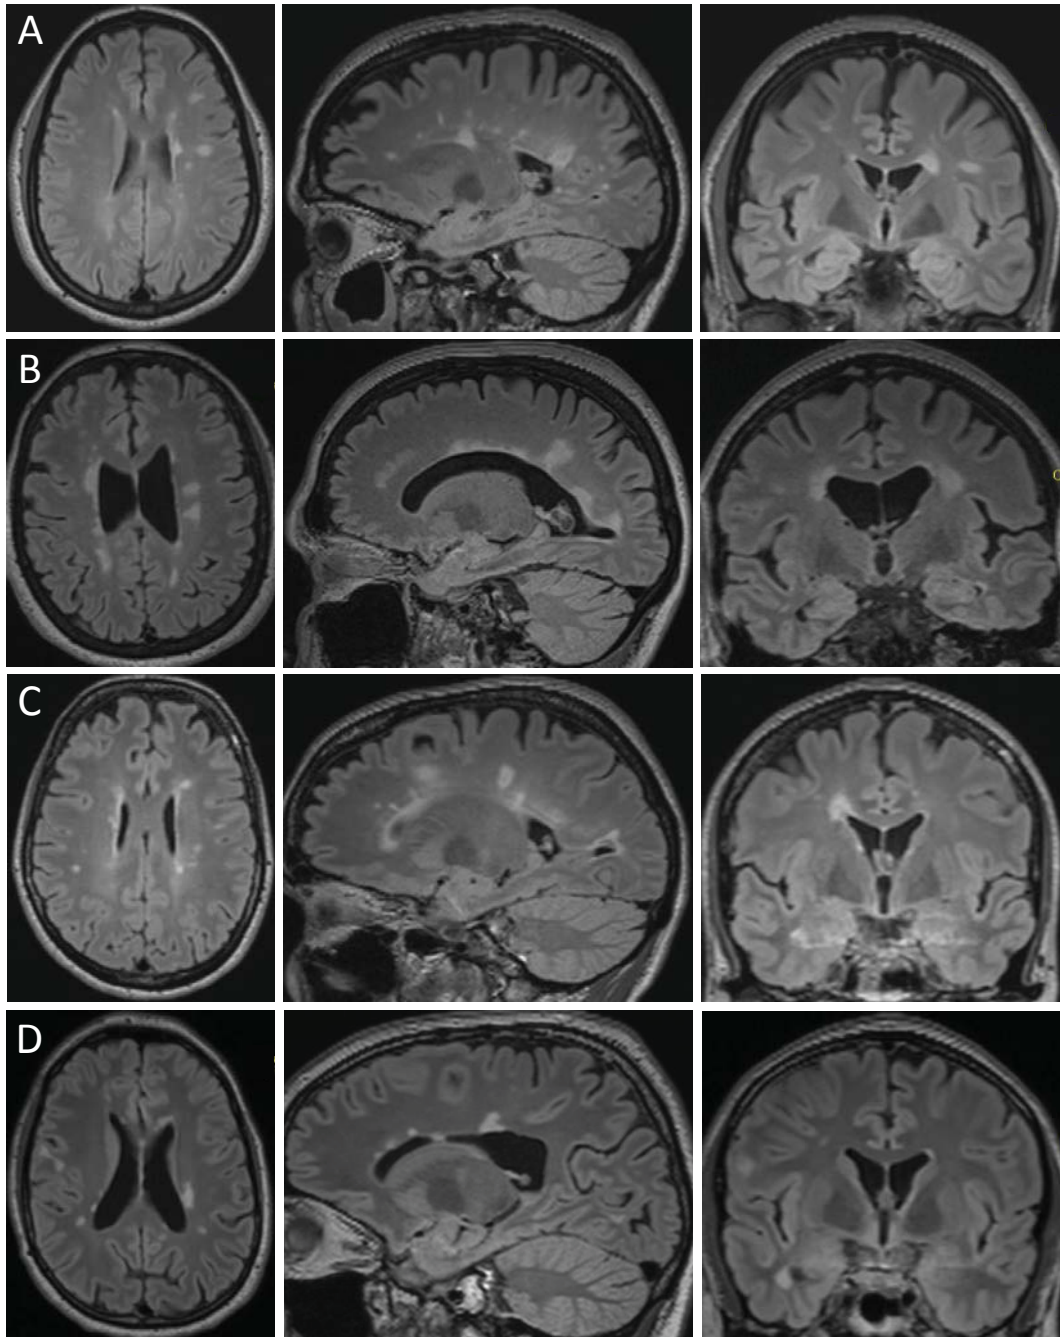

**Figure e- 3: Cerebral MRIs depicting typical MS lesions**

A, Patient 1, B, Patient 3, C, Patient 4, D, Patient 5.

FLAIR sequences in axial plane, sagittal plane and coronal plane. Depiction of Dawson's finger type (ovoid lesions in a perpendicular alignment) periventricular lesions, lesions in the corpus callosum, subcortical lesions, lesions adjacent to the body of the lateral ventricle and in the temporal lobe.
